# Supplementary material
Source: publisher figshare collection journal article supplement (https://tandf.figshare.com/ndownloader/files/20065394)
Supplement: Supplementary file 1 [file 20065394]

## Appendix A: Summary TSA-Tables 5, 7

| Table A1, TSA-TABLE 5: Production accounts of tourism industries and other industries (at basic prices in £millions), 2013 |                            |          |              |                                    |          |              |                     |          |              |                            |          |              |
|----------------------------------------------------------------------------------------------------------------------------|----------------------------|----------|--------------|------------------------------------|----------|--------------|---------------------|----------|--------------|----------------------------|----------|--------------|
| Products                                                                                                                   | Accommodation for visitors |          |              | Food and beverage serving industry |          |              | Passenger transport |          |              | Transport equipment rental |          |              |
|                                                                                                                            | Total Wales                | Regional | Non Regional | Total Wales                        | Regional | Non Regional | Total Wales         | Regional | Non Regional | Total Wales                | Regional | Non Regional |
| Accommodation services for visitors                                                                                        | 891                        | 610      | 281          | 91                                 | 60       | 32           | 0                   | 0        | 0            | 0                          | 0        | 0            |
| Food and beverage serving activities                                                                                       | 345                        | 75       | 270          | 2,739                              | 1,791    | 949          | 7                   | 1        | 6            | 0                          | 0        | 0            |
| Passenger transport services                                                                                               | 0                          | 0        | 0            | 0                                  | 0        | 0            | 1,093               | 241      | 852          | 0                          | 0        | 0            |
| Transport equipment rental services                                                                                        | 1                          | 1        | 0            | 3                                  | 2        | 1            | 20                  | 2        | 18           | 238                        | 70       | 168          |
| Travel agencies & other reservation services                                                                               | 0                          | 0        | 0            | 0                                  | 0        | 0            | 0                   | 0        | 0            | 0                          | 0        | 0            |
| Cultural, sports & exhibition activities                                                                                   | 1                          | 0        | 0            | 8                                  | 5        | 3            | 1                   | 0        | 1            | 2                          | 0        | 1            |
| Other consumption products                                                                                                 | 6                          | 4        | 3            | 49                                 | 32       | 17           | 14                  | 1        | 12           | 5                          | 2        | 4            |
| TOTAL OUTPUT                                                                                                               | 1,322                      | 767      | 555          | 2,891                              | 1,890    | 1,001        | 1,134               | 246      | 888          | 245                        | 72       | 173          |
| TOTAL INTERMEDIATE CONSUMPTION<br>(at purchasers prices)                                                                   | 734                        | 426      | 308          | 1,710                              | 1,118    | 592          | 591                 | 109      | 482          | 110                        | 32       | 78           |
| TOTAL GROSS VALUE ADDED<br>(at basic prices)                                                                               | 588                        | 341      | 247          | 1,181                              | 772      | 409          | 543                 | 137      | 406          | 135                        | 40       | 95           |

| TSA-TABLE 5 (continued)                      |                                                         |          |              |                                          |          |              |                          |          |              |                  |          |              |                                                |          |              |
|----------------------------------------------|---------------------------------------------------------|----------|--------------|------------------------------------------|----------|--------------|--------------------------|----------|--------------|------------------|----------|--------------|------------------------------------------------|----------|--------------|
| Products                                     | Travel agencies and other reservation services industry |          |              | Cultural, sports & exhibition activities |          |              | Tourism Industries TOTAL |          |              | Other industries |          |              | Output of domestic producers (at basic prices) |          |              |
|                                              | Total Wales                                             | Regional | Non Regional | Total Wales                              | Regional | Non Regional | Total Wales              | Regional | Non Regional | Total Wales      | Regional | Non Regional | Total Wales                                    | Regional | Non Regional |
| Accommodate services for visitors            | 0                                                       | 0        | 0            | 2                                        | 1        | 1            | 985                      | 670      | 314          | 31               | 21       | 10           | 1,016                                          | 691      | 324          |
| Food and beverage serving activities         | 0                                                       | 0        | 0            | 72                                       | 23       | 50           | 3,164                    | 1,890    | 1,275        | 645              | 385      | 260          | 3,810                                          | 2,275    | 1,534        |
| Passenger transport services                 | 0                                                       | 0        | 0            | 0                                        | 0        | 0            | 1,093                    | 241      | 852          | 217              | 119      | 98           | 1,310                                          | 360      | 950          |
| Transport equipment rental services          | 7                                                       | 4        | 3            | 18                                       | 6        | 12           | 286                      | 84       | 202          | 148              | 43       | 104          | 434                                            | 128      | 306          |
| Travel agencies & other reservation services | 150                                                     | 83       | 67           | 0                                        | 0        | 0            | 150                      | 83       | 67           | 0                | 0        | 0            | 150                                            | 83       | 67           |
| Cultural, sports & exhibition activities     | 1                                                       | 1        | 0            | 1,537                                    | 474      | 1,062        | 1,549                    | 481      | 1,068        | 1,777            | 253      | 1,524        | 3,326                                          | 735      | 2,592        |
| Other consumption products                   | 591                                                     | 328      | 263          | 215                                      | 67       | 149          | 881                      | 434      | 447          | 115,027          | 65,778   | 49,249       | 115,907                                        | 66,211   | 49,696       |
| TOTAL OUTPUT                                 | 749                                                     | 416      | 333          | 1,844                                    | 570      | 1,274        | 8,185                    | 3,961    | 4,224        | 117,844          | 55,089   | 62,755       | 125,952                                        | 59,050   | 66,979       |
| TOTAL INTERMEDIATE CONS (purchasers prices)  | 317                                                     | 176      | 141          | 609                                      | 187      | 422          | 4,071                    | 2,048    | 2,023        | 53,132           | 26,732   | 26,400       | 57,202                                         | 28,780   | 28,422       |
| TOTAL GVA (at basic prices)                  | 432                                                     | 240      | 192          | 1,234                                    | 383      | 851          | 4,114                    | 1,913    | 2,201        | 61,143           | 28,428   | 32,715       | 65,256                                         | 30,342   | 34,916       |

Table A2, TSA-TABLE 7 Extended: Employment in the tourism industries in Wales, 2013

| Tourism Characteristic Activities            | FTE    |          |              | GVA/FTE |          |              | Output/FTE |          |              |
|----------------------------------------------|--------|----------|--------------|---------|----------|--------------|------------|----------|--------------|
|                                              | Total  | Regional | Non Regional | Total   | Regional | Non Regional | Total      | Regional | Non Regional |
| Accommodation services for visitors          | 18,209 | 12,716   | 5,492        | 32,292  | 26,817   | 44,975       | 72,601     | 60,318   | 101,056      |
| Food and beverage serving activities         | 41,830 | 28,261   | 13,569       | 28,233  | 27,317   | 30,142       | 69,113     | 66,877   | 73,771       |
| Passenger transport services                 | 6,796  | 4,452    | 2,342        | 79,900  | 30,997   | 173,783      | 166,863    | 55,256   | 379,163      |
| Transport equipment rental services          | 877    | 719      | 158          | 153,934 | 55,633   | 601,266      | 279,361    | 100,139  | 1,094,937    |
| Travel agencies & other reservation services | 2,327  | 1,578    | 749          | 185,647 | 152,091  | 256,342      | 321,874    | 263,625  | 444,593      |
| Cultural, sports & exhibition activities     | 16,464 | 12,132   | 4332         | 74,951  | 31,569   | 196,445      | 112,002    | 46,983   | 294,090      |
| Tourism Totals                               | 86,500 | 59,858   | 26,642       | 47,549  | 31,976   | 82,614       | 94,624     | 66,173   | 158,547      |

## Appendix B

Table B1. Business and Location Coverage of Survey Returns and Interviews Undertaken

| Participants       | Businesses and Locations                                                                                                | Interviews<br>(25) | Surveys<br>(81) | Total<br>(106) |
|--------------------|-------------------------------------------------------------------------------------------------------------------------|--------------------|-----------------|----------------|
| Type of Businesses | Accommodation                                                                                                           | 5                  | 47              | 52             |
|                    | Restaurant                                                                                                              | 1                  | 4               | 5              |
|                    | Tourist Attractions                                                                                                     | 15                 | 30              | 49             |
|                    | Other Businesses                                                                                                        | 4                  |                 |                |
| Region of Wales    | Llandudno and Colwyn Bay                                                                                                | 3                  | 7               | 10             |
|                    | Anglesey                                                                                                                | 0                  | 1               | 1              |
|                    | Denbighshire                                                                                                            | 0                  | 8               | 8              |
|                    | Snowdonia                                                                                                               | 1                  | 8               | 9              |
|                    | Ceredigion                                                                                                              | 0                  | 3               | 3              |
|                    | Mid Wales and Brecon Beacons                                                                                            | 2                  | 18              | 20             |
|                    | Cardiff                                                                                                                 | 3                  | 6               | 9              |
|                    | South Wales Valleys                                                                                                     | 3                  | 2               | 5              |
|                    | Wye Valley and Vale of Usk                                                                                              | 2                  | 7               | 9              |
|                    | Glamorgan Heritage Coast and Countryside                                                                                | 4                  | 2               | 6              |
|                    | Carmarthenshire                                                                                                         | 2                  | 5               | 7              |
|                    | Pembrokeshire                                                                                                           | 3                  | 8               | 11             |
|                    | Swansea                                                                                                                 | 2                  | 4               | 6              |
|                    | Other Locations                                                                                                         | 0                  | 2               | 2              |
| Themes Covered     | Business types, Turnover, Employment, Impact of Brexit, Inputs and local sourcing, Customers origin, Relevant comments. |                    |                 |                |
